# Supplementary material
Source: PubMed Central journal article supplement (PMC6555860)
Supplement: BPH-176-2321-s001.pdf [file BPH-176-2321-s001.pdf]

## **Supplementary table legend**

**Table S1** Antimicrobial activity of fatty acids

**Table S2** Antibacterial activity of lipopeptides against *P. acnes* ATCC11827 in saline solution

**Table S3** Antimicrobial activity of designed lipopeptides in MH media

**Table S4** Thermodynamic parameters of interactions between lipopeptides with lipids

**Table S5** Fluorescence spectroscopy parameters measured for blueshift of tryptophan in different lipids

**Table S6** The design of *in vivo* experiment

**Table S1** Antimicrobial activity of fatty acids

| Fatty acids | MIC ( $\mu\text{g/mL}$ ) <sup>*</sup> |                              |
|-------------|---------------------------------------|------------------------------|
|             | <i>P. acnes</i><br>ATCC6919           | <i>P. acnes</i><br>ATCC11827 |
| C6:0        | >125                                  | >125                         |
| C8:0        | >125                                  | >125                         |
| C10:0       | >125                                  | >125                         |
| C12:0       | 62.5                                  | 62.5                         |
| C14:0       | 62.5                                  | 62.5                         |
| C16:0       | >125                                  | >125                         |
| C18:0       | >125                                  | >125                         |
| C20:0       | >125                                  | >125                         |

<sup>\*</sup>MIC: minimal inhibitory concentration



**Table S3** Antimicrobial activity of designed lipopeptides in MH media

| Sequence    | MIC ( $\mu\text{g/mL}$ ) |                       |                  |                |
|-------------|--------------------------|-----------------------|------------------|----------------|
|             | <i>P. acnes</i>          | <i>S. epidermidis</i> | <i>S. aureus</i> | <i>E. coli</i> |
|             | ATCC 11827               | ATCC 12228            | ATCC 25923       | ATC C25922     |
| C14-KWKW    | 3.9                      | 7.8                   | 15.6             | 31.25          |
| C16-KWKW    | 2.0                      | 3.9                   | 15.6             | 15.6           |
| Clindamycin | 0.03                     | 0.06                  | 0.03             | 31.25          |

**Table S4** Thermodynamic parameters of interactions between lipopeptides with lipids

|                             | $K_d$ ( $\mu\text{M}$ ) | $K_a$ ( $\mu\text{M}^{-1}$ ) | $\Delta H$ (kJ/mol) | $\Delta G$ (kJ/mol) | $-T\Delta S$ (kJ/mol) |
|-----------------------------|-------------------------|------------------------------|---------------------|---------------------|-----------------------|
| C16-KWKW - <i>P. acnes</i>  | 0.287                   | 3.484                        | -11.8               | -37.4               | -25.6                 |
| C16-KWKW - <i>S. aureus</i> | N/A                     | N/A                          | N/A                 | N/A                 | N/A                   |
| C16-KWKW - <i>E. coli</i>   | N/A                     | N/A                          | N/A                 | N/A                 | N/A                   |
| Melittin - <i>P. acnes</i>  | 3.58                    | 0.279                        | -18.1               | -38.8               | -20.7                 |
| Melittin - <i>S. aureus</i> | 4.68                    | 0.213                        | -28.7               | -30.5               | -1.8                  |
| Melittin - <i>E. coli</i>   | 5.44                    | 0.184                        | -10.9               | -30.1               | -19.2                 |

N/A: Not applicable

**Table S5** Fluorescence spectroscopy parameters measured for blue shift of tryptophan in different lipids

| Peptide  | Lipid                      | Wavelength (nm) | Blue shift (nm) |
|----------|----------------------------|-----------------|-----------------|
| C16-KWKW | PBS control                | 359.3±0.9       | -               |
|          | <i>P. ances</i> ATCC11827  | 337.7±0.5***    | 21.6±1.2        |
|          | <i>S. aureus</i> ATCC12600 | 358.7±0.5       | 0.7±0.5         |
|          | <i>E. coli</i> ATCC25922   | 357.7±1.7       | 1.7±1.2         |
| C10-KWKW | PBS control                | 343.7±1.2       | -               |
|          | <i>P. ances</i> ATCC11827  | 338.0±0.8**     | 5.7±0.5         |
|          | <i>S. aureus</i> ATCC12600 | 342.7±1.2       | 1.3±0.5         |
|          | <i>E. coli</i> ATCC25922   | 341.7±0.9       | 2.0±0.8         |
| Melittin | PBS control                | 342.7±0.9       | -               |
|          | <i>P. ances</i> ATCC11827  | 332.3±1.2***    | 10.3±0.5        |
|          | <i>S. aureus</i> ATCC12600 | 334.0±1.6***    | 8.7±0.9         |
|          | <i>E. coli</i> ATCC25922   | 330.3±0.5***    | 12.3±0.5        |

**Table S6** The design of *in vivo* experiment

| <b>Group</b>            | <b>Left ear</b>                                               | <b>Right ear</b>                                                                           |
|-------------------------|---------------------------------------------------------------|--------------------------------------------------------------------------------------------|
| Blank control           | Untreated                                                     | Untreated                                                                                  |
| Clindamycin-treated     | Injected with <i>P. acnes</i> and treated with 50 mg vaseline | Injected with <i>P. acnes</i> and treated with 10 µg clindamycin mixed with 50 mg vaseline |
| 100 µg C16-KWKW-treated | Injected with <i>P. acnes</i> and treated with 50 mg vaseline | Injected with <i>P. acnes</i> and treated with 100 µg C16-KWKW mixed with 50 mg vaseline   |
| 200 µg C16-KWKW-treated | Injected with <i>P. acnes</i> and treated with 50 mg vaseline | Injected with <i>P. acnes</i> and treated with 200 µg C16-KWKW mixed with 50 mg vaseline   |

## Supplementary figure legend

**Figure S1** Binding of C16-KWKW with lipids from *P. acnes*, *S. aureus* and *E. coli*, melittin was used as control. A significant binding can be observed between 150  $\mu\text{g/mL}$  C16-KWKW and 4 mg/mL lipid extracted from *P. acnes*, whereas C16-KWKW bound very weakly to other lipids at the same concentration. In contrast, 200  $\mu\text{g/mL}$  melittin shows binding with lipids from all the three strains at 4 mg/mL, and the binding difference was not significant. N=5. Each experiment was repeated independently 5 times.

**Figure S2** Tryptophan fluorescence emission spectra of the lipopeptides using various liposome models. The lipid extracted from *P. acnes* treated with C16-KWKW or C10-KWKW at 150  $\mu\text{g/mL}$  showed a significant blueshift in the maximum emission spectrum, while the blueshift in other lipids was not obvious. In contrast, melittin produced a significant blueshift with all three lipids at the same concentration. N=5. Each experiment was repeated independently 5 times.



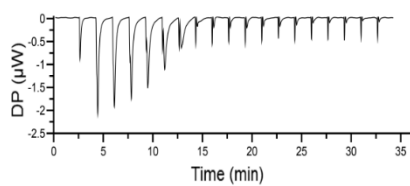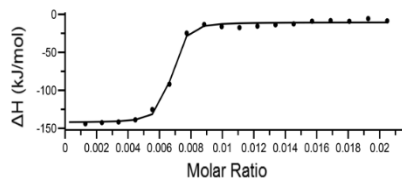

**C16-KWKW - *P. acnes***

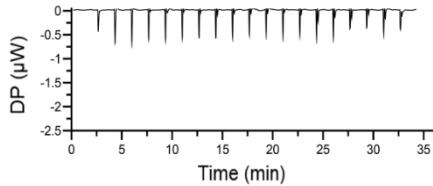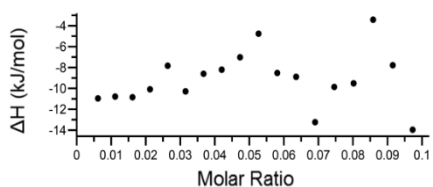

**C16-KWKW - *S. aureus***

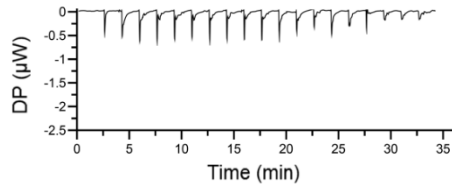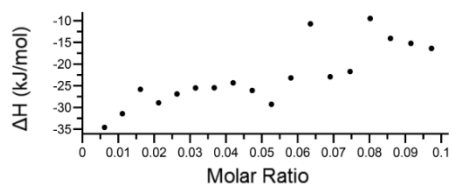

**C16-KWKW - *E. coli***

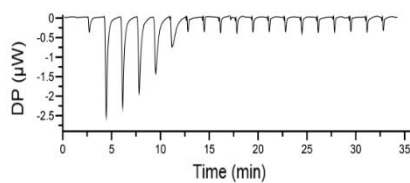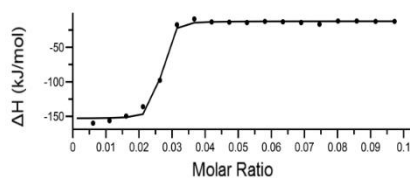

**Melittin - *P. acnes***

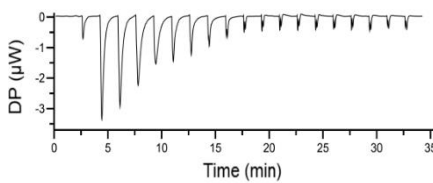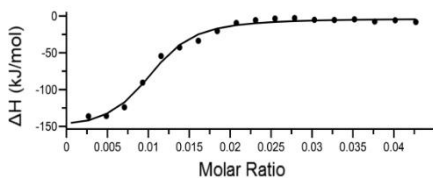

**Melittin - *S. aureus***

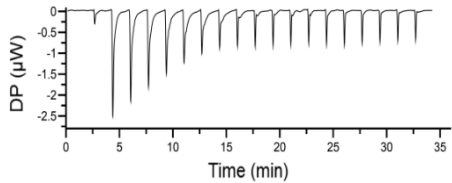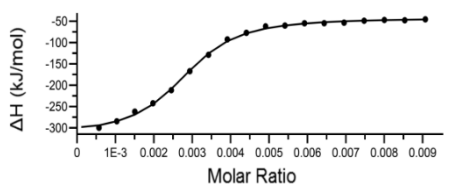

**Melittin - *E. coli***

**Figure S1** Binding of C16-KWKW with lipids from *P. acnes*, *S. aureus* and *E. coli*, melittin was used as control. A significant binding can be observed between 150  $\mu\text{g/mL}$  C16-KWKW and 4  $\text{mg/mL}$  lipid extracted from *P. acnes*, whereas C16-KWKW bound very weakly to other lipids at the same concentration. In contrast, 200  $\mu\text{g/mL}$  melittin shows binding with lipids from all the three strains at 4  $\text{mg/mL}$ , and the binding difference was not significant.  $N=5$ . Each experiment was repeated independently 5 times.

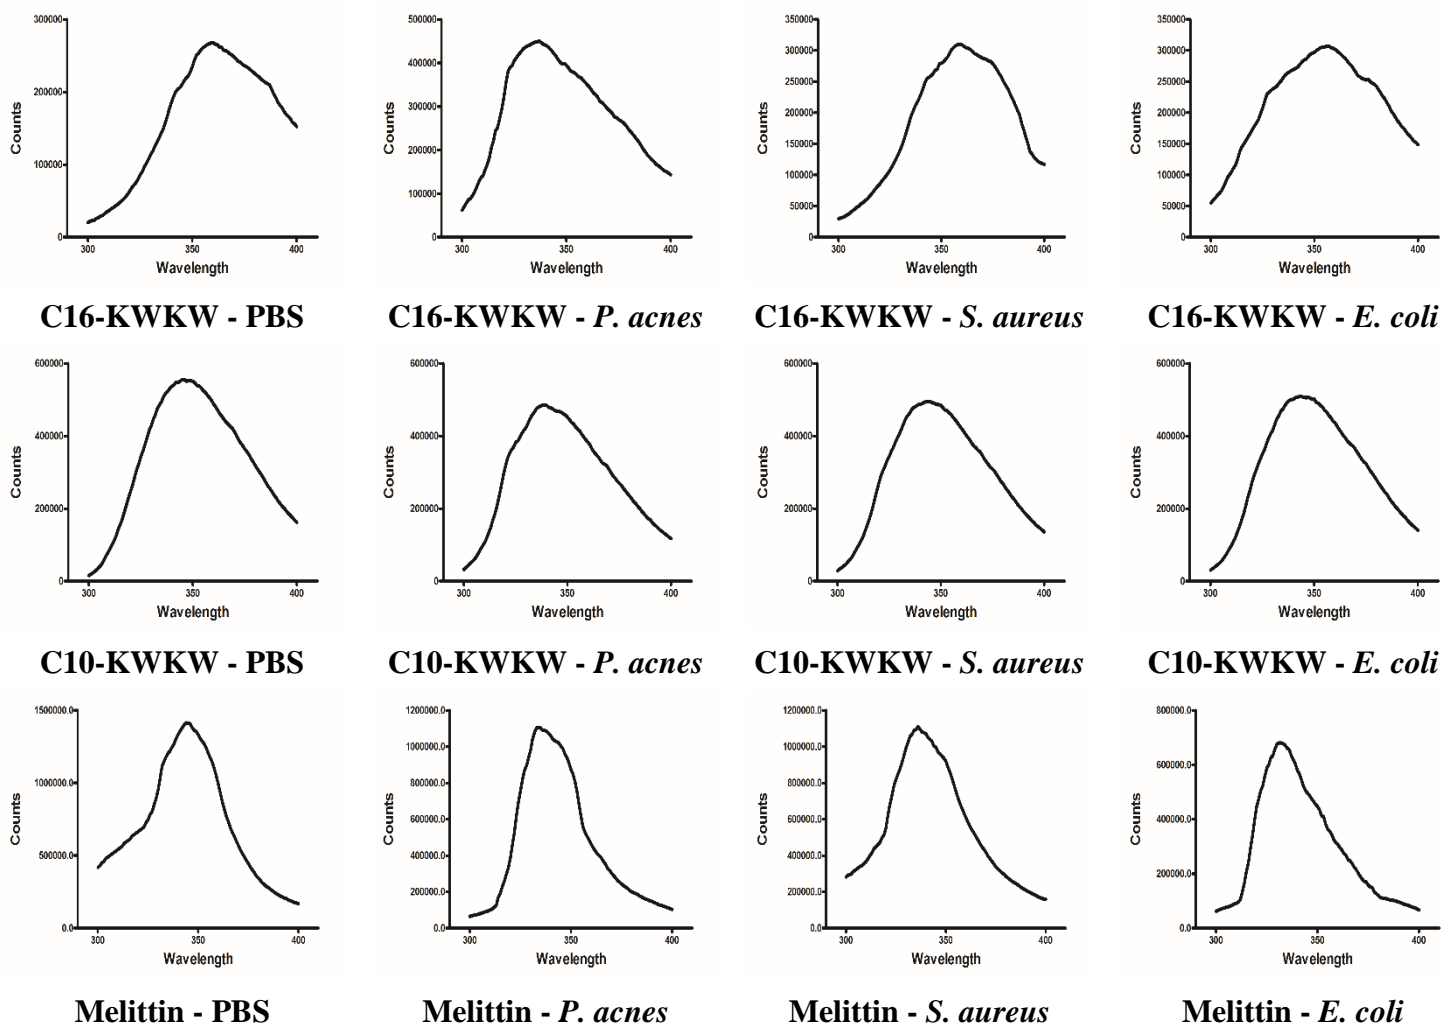

**Figure S2** Tryptophan fluorescence emission spectra of the lipopeptides using various liposome models. The lipid extracted from *P. acnes* treated with C16-KWKW or C10-KWKW at 150  $\mu\text{g}/\text{mL}$  showed a significant blueshift in the maximum emission spectrum, while the blueshift in other lipids was not obvious. In contrast, melittin produced a significant blueshift with all three lipids at the same concentration. N=5. Each experiment was repeated independently 5 times.
